# Supplementary material for: Improved Water, Sanitation and Utilization of Maternal and Child Health Services in South Asia—An Analysis of Demographic Health Surveys
Source: MDPI journal article supplement (doi:10.3390/ijerph18147667), 2021-07-19
Supplement: s1 [file s1]

**Table S2.** Cross tabulation and Spearman correlation of women who have access to improved and unimproved water and sanitation stratified by education.

|                       | Lower Education | Higher Education | Correlation |
|-----------------------|-----------------|------------------|-------------|
|                       | (%)             | (%)              |             |
| Improved Water        | 85.6            | 82.4             |             |
| Unimproved Water      | 9.1             | 9.0              |             |
| Missing               | 5.3             | 8.6              | 0.0306      |
|                       | (%)             | (%)              |             |
| Improved Sanitation   | 28.8            | 59.2             |             |
| Unimproved Sanitation | 66.0            | 32.1             |             |
| Missing               | 5.3             | 8.7              | 0.2886      |
