# Supplementary material for: Improved Water, Sanitation and Utilization of Maternal and Child Health Services in South Asia—An Analysis of Demographic Health Surveys
Source: MDPI journal article supplement (doi:10.3390/ijerph18147667), 2021-07-19
Supplement: s1 [file s1]

**Table S4.** Association between improved (vs. unimproved) sanitation facilities and indicators of maternal and child health care services by DHS wealth index.

| Reproductive and infant health outcomes              | All<br>N | With MCH service and<br>unimproved Sanitation<br>N (%) | With MCH service and<br>improved Sanitation<br>N (%) | Crude OR<br>(95% CI) | Adjusted OR<br>(95% CI) <sup>a</sup> |
|------------------------------------------------------|----------|--------------------------------------------------------|------------------------------------------------------|----------------------|--------------------------------------|
| <b>Lower wealth index (poorest, poorer)</b>          |          |                                                        |                                                      |                      |                                      |
| Up-to-date immunizations                             | 69,234   | 52.9                                                   | 61.4                                                 | 1.42 (1.33, 1.50)    | 1.26 (1.18, 1.34)                    |
| Adequate ANC visits (4 or more)                      | 69,234   | 30.5                                                   | 44.7                                                 | 1.85 (1.73, 1.98)    | 1.59 (1.48, 1.71)                    |
| Adequate ANC visits (8 or more)                      | 69,234   | 7.8                                                    | 12.2                                                 | 1.64 (1.46, 1.85)    | 1.42 (1.25, 1.61)                    |
| Skilled attendant at delivery                        | 69,234   | 69.7                                                   | 69.0                                                 | 0.97 (0.91, 1.04)    | 1.05 (0.98, 1.13)                    |
| <b>Higher wealth index (middle, richer, richest)</b> |          |                                                        |                                                      |                      |                                      |
| Up-to-date immunizations                             | 76,028   | 62.8                                                   | 67.5                                                 | 1.23 (1.16, 1.31)    | 1.14 (1.07, 1.22)                    |
| Adequate ANC visits (4 or more)                      | 76,028   | 57.7                                                   | 64.9                                                 | 1.37 (1.29, 1.46)    | 1.11 (1.04, 1.18)                    |
| Adequate ANC visits (8 or more)                      | 76,028   | 22.6                                                   | 28.3                                                 | 1.36 (1.26, 1.47)    | 1.08 (0.99, 1.17)                    |
| Skilled attendant at delivery                        | 76,028   | 87.3                                                   | 89.7                                                 | 1.25 (1.15, 1.37)    | 1.09 (0.99, 1.20)                    |

<sup>a</sup>Adjusted for country and year fixed effects, respondent's age, educational attainment, marital status, child's birth order, child's sex, child's age in months, urban/rural residency, presence of improved water sources, presence of hand washing facilities on site and log GDP per capita.
