# Supplementary material for: Improved Water, Sanitation and Utilization of Maternal and Child Health Services in South Asia—An Analysis of Demographic Health Surveys
Source: MDPI journal article supplement (doi:10.3390/ijerph18147667), 2021-07-19
Supplement: s1 [file s1]

**Table S1.** Cross tabulation of women who have access to improved and unimproved water vs. improved and unimproved sanitation.

|                         | <b>Unimproved sanitation</b> | <b>Improved sanitation</b> | <b>Missing</b> |
|-------------------------|------------------------------|----------------------------|----------------|
|                         | (%)                          | (%)                        | (%)            |
| <b>Unimproved water</b> | 53.0                         | 46.9                       | 0.11           |
| <b>Improved water</b>   | 46.4                         | 53.4                       | 0.18           |
| <b>Missing</b>          | 0.8                          | 1.0                        | 98.2           |
