# Supplementary material for: Improved Water, Sanitation and Utilization of Maternal and Child Health Services in South Asia—An Analysis of Demographic Health Surveys
Source: MDPI journal article supplement (doi:10.3390/ijerph18147667), 2021-07-19
Supplement: s1 [file s1]

**Table S3.** Associations between improved (vs. unimproved) water sources and indicators of maternal and child health care services by DHS wealth index.

| Reproductive and infant health outcomes              | All<br>N | With MCH service and<br>unimproved water<br>(%) | With MCH service and<br>improved water<br>(%) | Crude OR<br>(95% CI) | Adjusted OR (95% CI) <sup>a</sup> |
|------------------------------------------------------|----------|-------------------------------------------------|-----------------------------------------------|----------------------|-----------------------------------|
| <b>Lower wealth index (poorest, poorer)</b>          |          |                                                 |                                               |                      |                                   |
| Up-to-date immunizations                             | 69,234   | 48.3                                            | 55.4                                          | 1.33 (1.24, 1.43)    | 1.30 (1.20, 1.40)                 |
| Adequate ANC visits (4 or more)                      | 69,234   | 34.7                                            | 33.3                                          | 0.94 (0.86, 1.02)    | 0.95 (0.88, 1.04)                 |
| Adequate ANC visits (8 or more)                      | 69,234   | 8.1                                             | 8.8                                           | 1.10 (0.94, 1.29)    | 1.06 (0.91, 1.23)                 |
| Skilled attendant at delivery                        | 69,234   | 66.1                                            | 70.0                                          | 1.20 (1.09, 1.31)    | 1.28 (1.19, 1.39)                 |
| <b>Higher wealth index (middle, richer, richest)</b> |          |                                                 |                                               |                      |                                   |
| Up-to-date immunizations                             | 76,028   | 66.4                                            | 66.6                                          | 1.01 (0.92, 1.11)    | 0.99 (0.90, 1.09)                 |
| Adequate ANC visits (4 or more)                      | 76,028   | 67.3                                            | 63.1                                          | 0.84 (0.76, 0.92)    | 0.88 (0.80, 0.97)                 |
| Adequate ANC visits (8 or more)                      | 76,028   | 29.4                                            | 26.9                                          | 0.89 (0.80, 0.99)    | 0.92 (0.83, 1.03)                 |
| Skilled attendant at delivery                        | 76,028   | 91.7                                            | 89.0                                          | 0.69 (0.57, 0.82)    | 0.88 (0.73, 1.06)                 |

<sup>a</sup>Adjusted for country and year fixed effects, respondent's age, educational attainment, marital status, child's birth order, child's sex, child's age in months, urban/rural residency, appropriate treatment of water, improved sanitation and log GDP per capita.
